# Supplementary material for: Comparison of Wealth-Related Inequality in Tetanus Vaccination Coverage before and during Pregnancy: A Cross-Sectional Analysis of 72 Low- and Middle-Income Countries
Source: MDPI journal article supplement (doi:10.3390/vaccines12040431), 2024-04-17
Supplement: s1 [file s1]

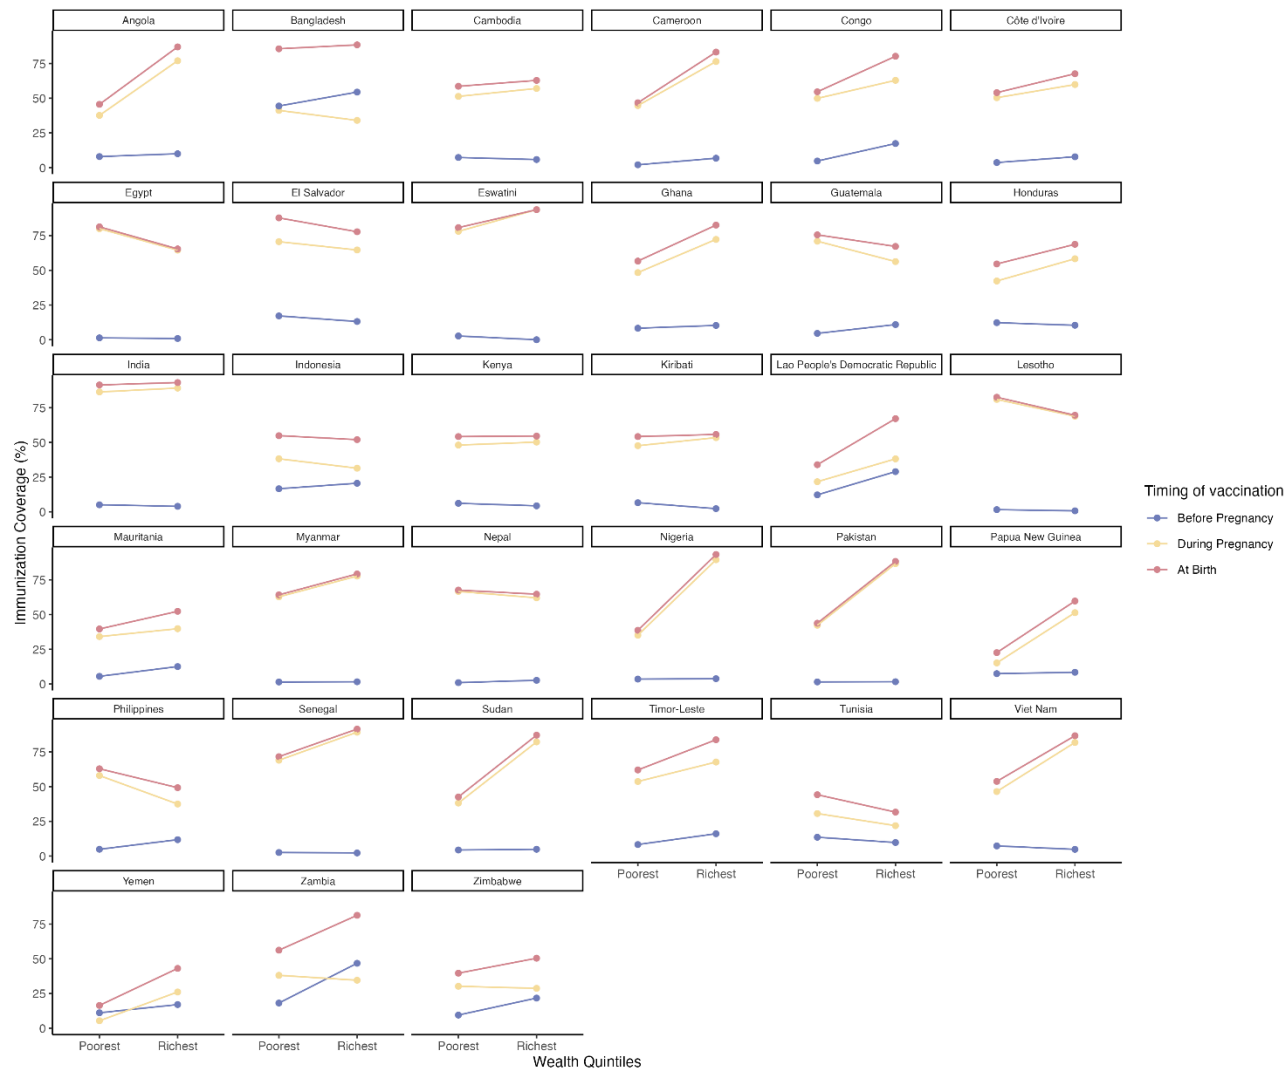

**Figure S2: Tetanus immunization coverage before pregnancy, during pregnancy, and at birth, in the wealthiest and least wealthy wealth quintiles in 33 lower-middle income countries**

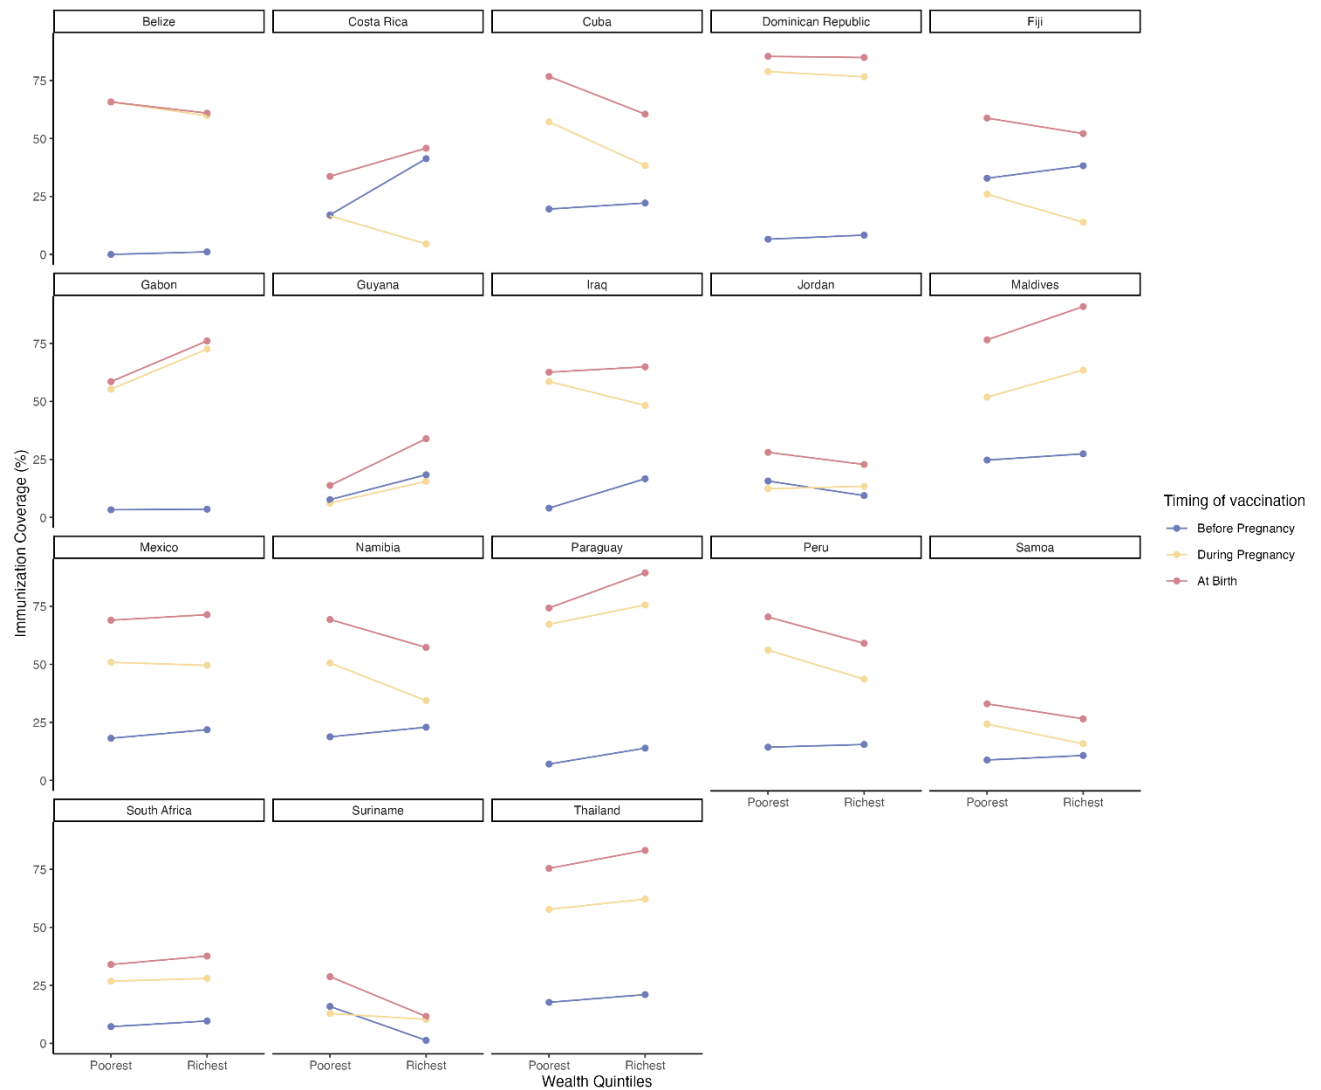

**Figure S3: Tetanus immunization coverage before pregnancy, during pregnancy, and at birth, in the wealthiest and least wealthy wealth quintiles in 18 upper-middle income countries**

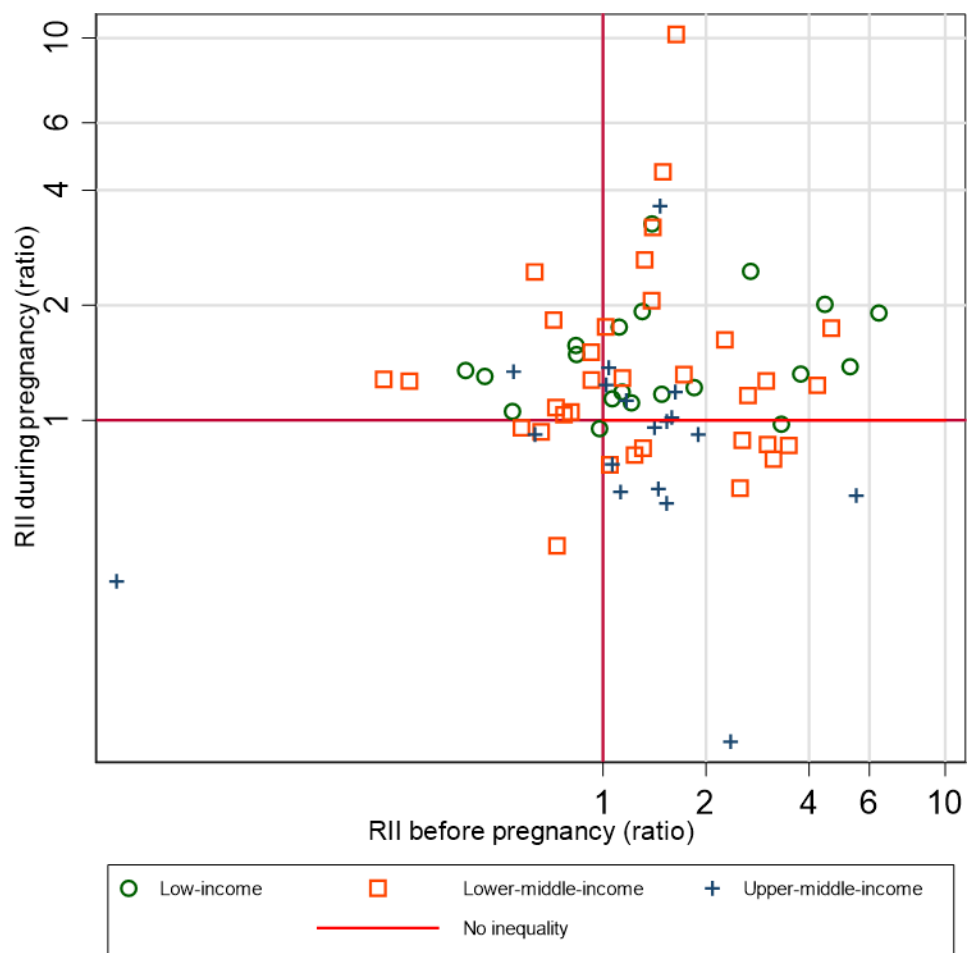

**Figure S4. Relative inequality (RII) in maternal tetanus immunization coverage by wealth quintile, before versus during pregnancy**
