# Supplementary material for: Comparison of Wealth-Related Inequality in Tetanus Vaccination Coverage before and during Pregnancy: A Cross-Sectional Analysis of 72 Low- and Middle-Income Countries
Source: Vaccines (Basel). 2024 Apr 17;12(4):431. doi: 10.3390/vaccines12040431 (PMC11054082; doi:10.3390/vaccines12040431)
Supplement: Supplementary file 1 [file vaccines-12-00431-s001.zip › Supplemental Table S1.xlsx]

## Sheet: Sheet1
Supplemental Table S1. TTCV schedule for 72 study countries at time of survey.
		TTCV Schedule
Country	Survey year	3 infant doses	Booster dose at age 12-23 months	Booster dose at age 4-7 years	Boster dose at age 9-15 years	Full 6-dose WHO recommended TTCV schedule
Afghanistan	2015	Yes
Angola	2015	Yes
Bangladesh	2019	Yes
Belize	2015	Yes	Yes	Yes	Yes	Yes
Benin	2017	Yes
Burundi	2016	Yes	Yes
Cambodia	2021	Yes
Cameroon	2018	Yes
Central African Republic	2018	Yes
Chad	2019	Yes
Congo	2014	Yes
Costa Rica	2018	Yes	Yes	Yes	Yes	Yes
Côte d'Ivoire	2016	Yes
Cuba	2019	Yes	Yes	Yes	Yes	Yes
Democratic Republic of the Congo	2017	Yes
Dominican Republic	2019	Yes	Yes	Yes
Egypt	2014	Yes	Yes	Yes	Yes	Yes
El Salvador	2014	Yes	Yes	Yes	Yes	Yes
Eswatini	2014	Yes		Yes
Ethiopia	2016	Yes
Fiji	2021	Yes		Yes	Yes
Gabon	2019	Yes
Gambia	2019	Yes	Yes
Ghana	2017	Yes
Guatemala	2014	Yes	Yes	Yes
Guinea	2018	Yes
Guinea-Bissau	2018	Yes
Guyana	2019	Yes	Yes	Yes
Haiti	2016	Yes	Yes
Honduras	2019	Yes	Yes	Yes	Yes	Yes
India	2019	Yes	Yes	Yes	Yes	Yes
Indonesia	2017	Yes	Yes	Yes	Yes	Yes
Iraq	2018	Yes	Yes	Yes
Jordan	2017	Yes	Yes	Yes	Yes	Yes
Kenya	2022	Yes
Kiribati	2018	Yes		Yes	Yes
Lao People's Democratic Republic	2017	Yes
Lesotho	2018	Yes	Yes
Liberia	2019	Yes
Madagascar	2021	Yes
Malawi	2019	Yes
Maldives	2016	Yes		Yes
Mali	2018	Yes
Mauritania	2019	Yes
Mexico	2015	Yes	Yes	Yes	Yes	Yes
Myanmar	2015	Yes
Namibia	2013	Yes		Yes
Nepal	2022	Yes
Niger	2021	Yes
Nigeria	2021	Yes
Pakistan	2017	Yes
Papua New Guinea	2016	Yes		Yes	Yes
Paraguay	2016	Yes	Yes	Yes	Yes	Yes
Peru	2019	Yes	Yes	Yes	Yes	Yes
Philippines	2022	Yes		Yes	Yes
Rwanda	2019	Yes
Samoa	2019	Yes		Yes
Senegal	2019	Yes
Sierra Leone	2019	Yes
South Africa	2016	Yes	Yes	Yes	Yes	Yes
Sudan	2014	Yes
Suriname	2018	Yes	Yes	Yes
Thailand	2019	Yes	Yes	Yes	Yes	Yes
Timor-Leste	2016	Yes		Yes
Togo	2017	Yes
Tunisia	2018	Yes	Yes	Yes	Yes	Yes
Uganda	2016	Yes
United Republic of Tanzania	2015	Yes
Viet Nam	2020	Yes	Yes
Yemen	2013	Yes
Zambia	2018	Yes
Zimbabwe	2019	Yes	Yes
TTCV: Tetanus Toxoid containing vaccine
